# Supplementary material for: In-depth proteomic analysis of boar spermatozoa through shotgun and gel-based methods
Source: PubMed Central journal article supplement (PMC5774113; doi:10.1186/s12864-018-4442-2), 2018-01-18
Supplement: 12864_2018_4442_MOESM1_ESM.pdf [file 12864_2018_4442_MOESM1_ESM.pdf]

## Sperm preparation

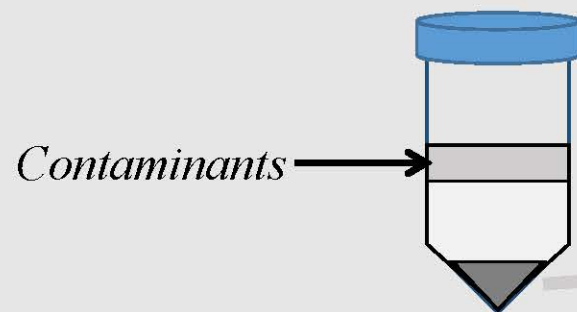

*Pellet suspended in the LB*

## Proteome procedures

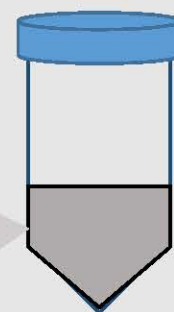

**Gel-based method**

**Shotgun method**

2-D Electrophoresis

In-gel digestion

In-solution digestion

(Nano) LC/MS-MS

Bioinformatics analysis/Annotation
