# Supplementary material for: In-depth proteomic analysis of boar spermatozoa through shotgun and gel-based methods
Source: PubMed Central journal article supplement (PMC5774113; doi:10.1186/s12864-018-4442-2), 2018-01-18

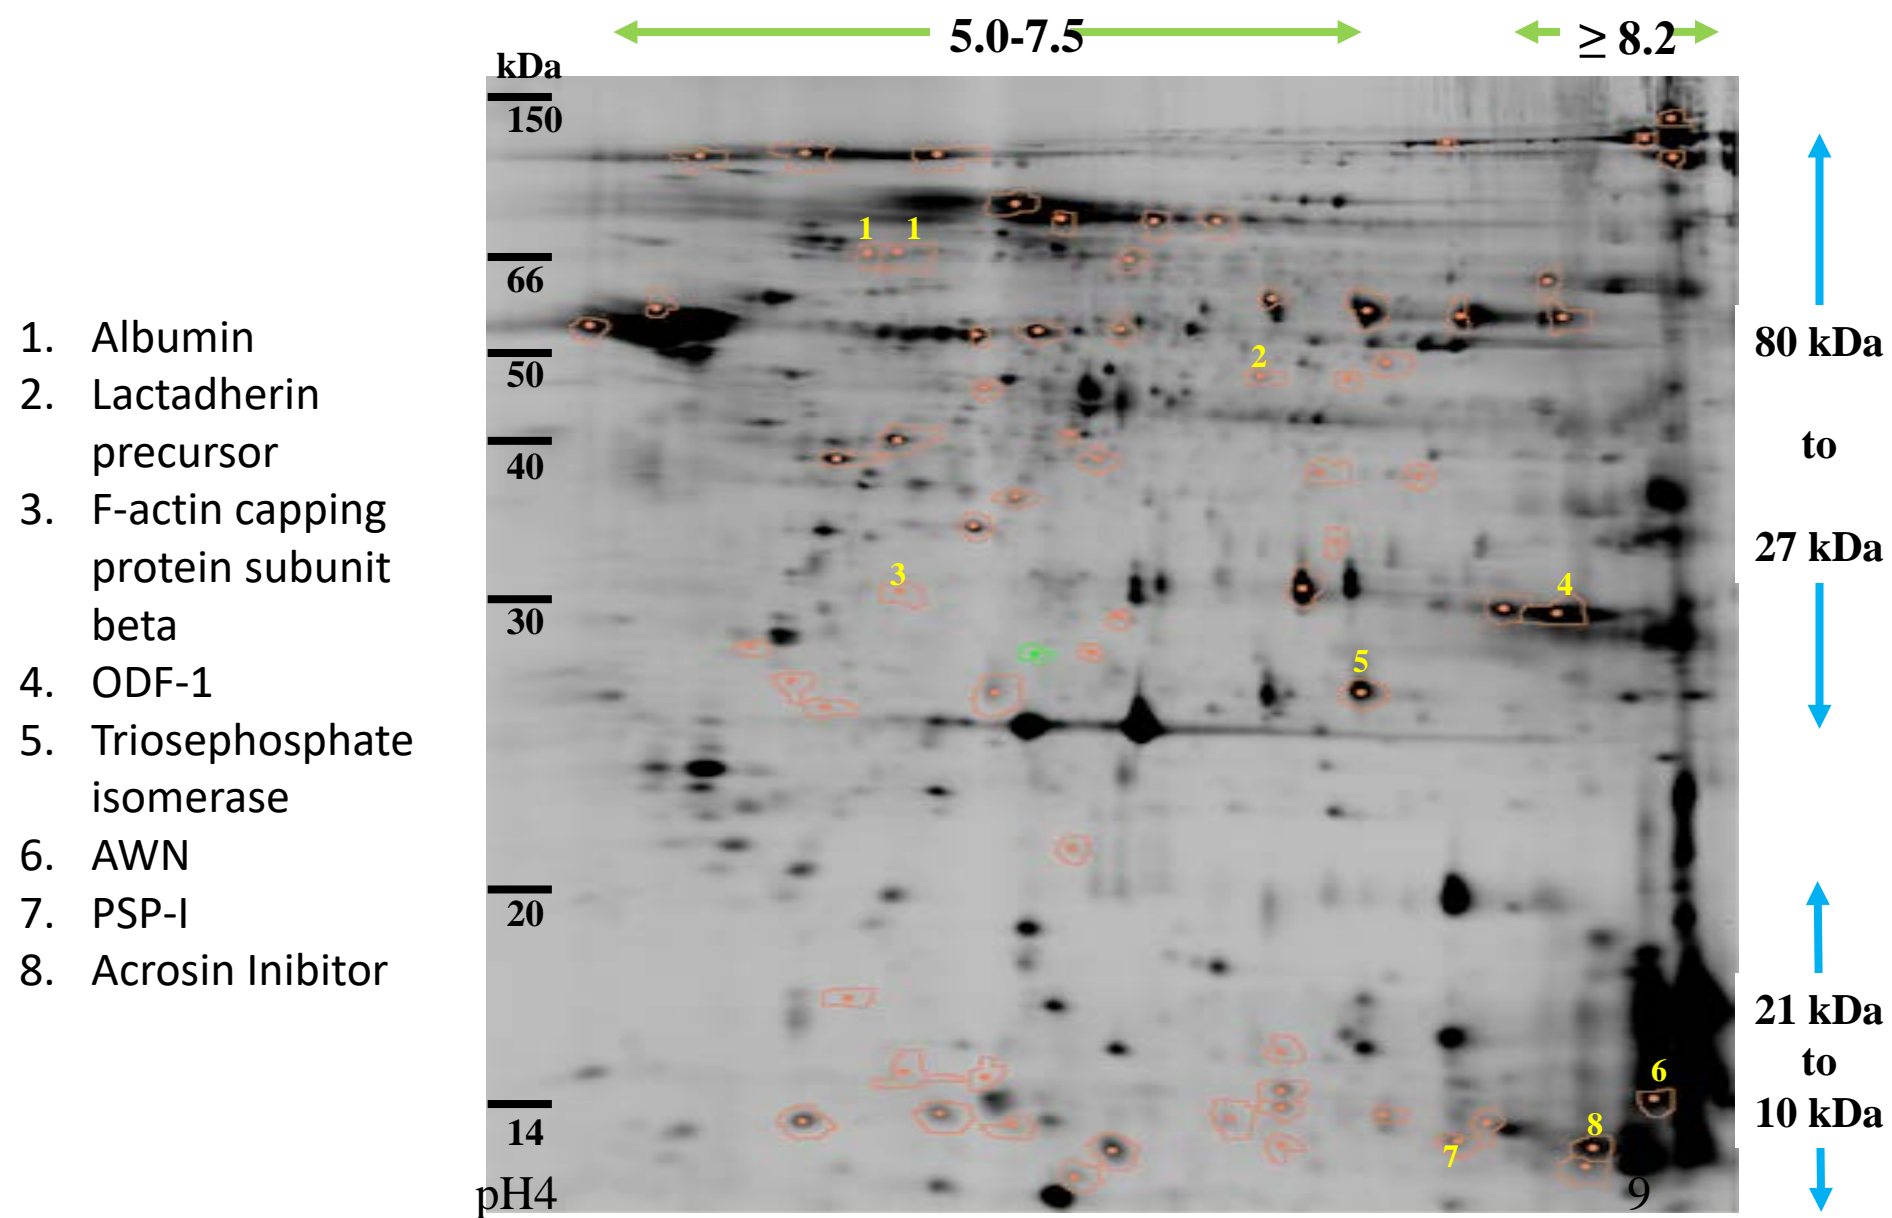

Supplement: 12864_2018_4442_MOESM3_ESM.pdf [file 12864_2018_4442_MOESM3_ESM.pdf]
